# Supplementary material for: Determination of Density of Starch Hydrogel Microspheres from Sedimentation Experiments Using Non-Stokes Drag Coefficient
Source: MDPI journal article supplement (doi:10.3390/gels10040277), 2024-04-19
Supplement: s1 [file s1]

# Determination of Density of Starch Hydrogel Microspheres from Sedimentation Experiments Using Non-Stokes Drag Coefficient

Margherita Cretella <sup>1,2,3</sup>, Mina Fazilati <sup>1,2</sup>, Nedim Krcic <sup>4</sup>, Ivan Argatov <sup>5,\*</sup> and Vitaly Kocherbitov <sup>1,2</sup>

<sup>1</sup> Department of Biomedical science, Malmö University, 20506 Malmö, Sweden; vitaly.kocherbitov@mau.se (V.K.)

<sup>2</sup> Biofilms Research Center for Biointerfaces, Malmö University, 20506 Malmö, Sweden

<sup>3</sup> Erasmus Student, University of Salerno, 84084 Fisciano, Italy

<sup>4</sup> Magle Chemoswed AB, 21215 Malmö, Sweden; nedim.krcic@maglechemoswed.com

<sup>5</sup> Institut für Mechanik, Technische Universität Berlin, 10623 Berlin, Germany

\* Correspondence: ivan.argatov@campus.tu-berlin.de

## S1. Additional graphs and tables

### S1.1. Volumetric swelling ratios in salt solutions

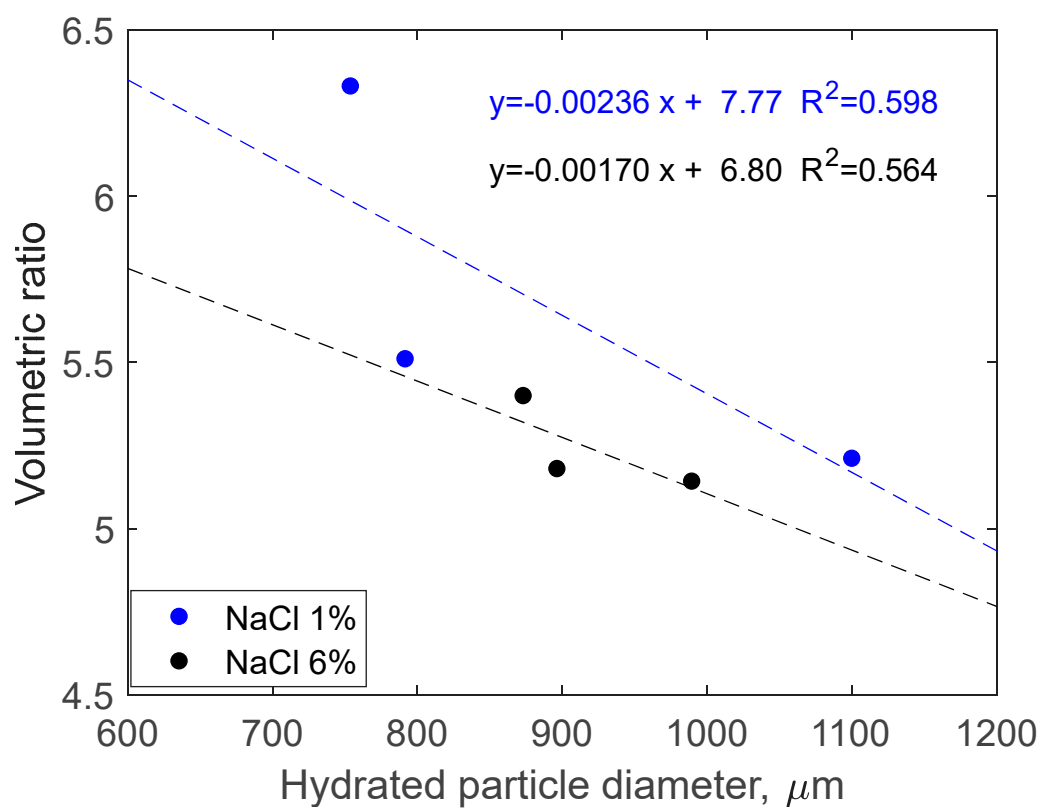

**Figure S1.** Comparison of DSM volumetric swelling ratio ( $\mu\text{m}^3/\mu\text{m}^3$ ) with the diameter ( $\mu\text{m}$ ) of the hydrated starch microsphere in a NaCl 1% salt solution and in a NaCl 6% salt solution.

## S1.2 Supplementary data on distances and velocities

(a)

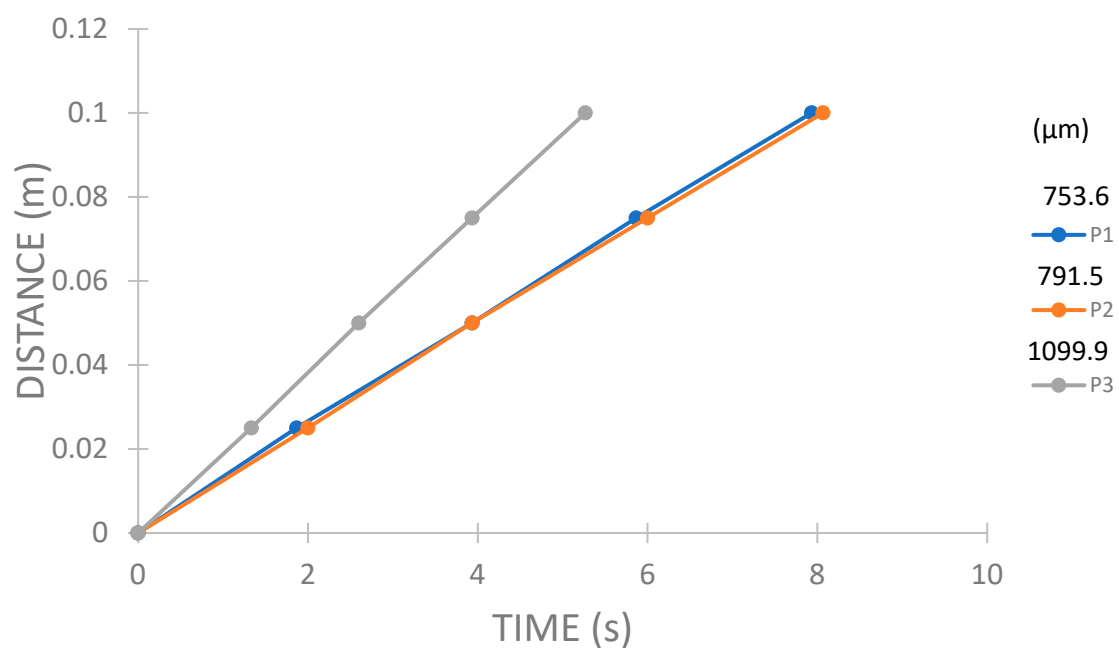

(b)

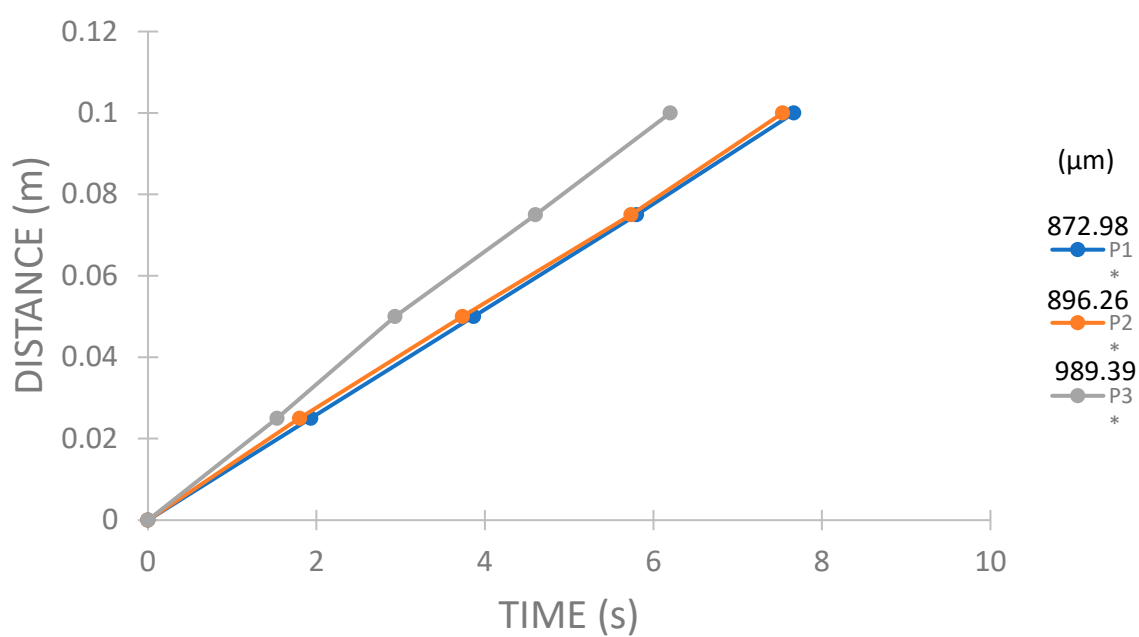

**Figure S2.** Travelled distances in a NaCl 1% salt solution (a) and in a NaCl 6% salt solution (b).

**Table S1.** DSM average sedimentation velocity in MQ water.

| Particle | Dry particle diameter ( $\mu\text{m}$ ) | Hydrated particle diameter ( $\mu\text{m}$ ) | Average velocity (mm/s) |
|----------|-----------------------------------------|----------------------------------------------|-------------------------|
| P1       | 282.3                                   | 538.3                                        | 6.26                    |
| P2       | 323.0                                   | 614.0                                        | 8.42                    |
| P3       | 357.9                                   | 680.9                                        | 9.77                    |
| P4       | 462.7                                   | 846.8                                        | 13.74                   |
| P5       | 410.3                                   | 753.7                                        | 12.07                   |
| P6       | 480.1                                   | 875.9                                        | 13.55                   |
| P7       | 634.4                                   | 1126.1                                       | 17.80                   |
| P8       | 648.9                                   | 1149.4                                       | 19.01                   |
| P9       | 683.8                                   | 1216.3                                       | 19.46                   |

**Table S2.** Swelling of DSM particles in salt solutions.

|                    |       | Dry particle diameter ( $\mu\text{m}$ ) | Hydrated particle diameter ( $\mu\text{m}$ ) | Volumetric swelling ratio ( $\mu\text{m}^3 / \mu\text{m}^3$ ) |
|--------------------|-------|-----------------------------------------|----------------------------------------------|---------------------------------------------------------------|
| <b>NaCl 1 w/V%</b> | PSS1  | 407.4                                   | 753.7                                        | 6.33                                                          |
|                    | PSS2  | 448.1                                   | 791.5                                        | 5.51                                                          |
|                    | PSS3  | 634.4                                   | 1099.9                                       | 5.21                                                          |
| <b>NaCl 6 w/V%</b> | PSS1* | 497.6                                   | 873.0                                        | 5.40                                                          |
|                    | PSS2* | 518.0                                   | 896.3                                        | 5.18                                                          |
|                    | PSS3* | 573.2                                   | 989.4                                        | 5.14                                                          |

\* In this notation PSS stands for particle in salt solution, the asterisk marks samples in 6% NaCl solution.

**Table S3.** Sedimentation of DSM particles in salt solutions. Average velocities, Reynolds numbers and drag coefficients.

|                        |       | <b>Average velocity<br/>(mm/s)</b> | <b>Particle density<br/>(kg/m<sup>3</sup>)</b> | <b>Reynolds number, Re</b> | <b>Drag coefficient, <math>C_D</math></b> |
|------------------------|-------|------------------------------------|------------------------------------------------|----------------------------|-------------------------------------------|
| <b>NaCl<br/>1 w/V%</b> | PSS1  | 12.87                              | 1069.7                                         | 10.94                      | 3.89                                      |
|                        | PSS2  | 12.53                              | 1062.4                                         | 11.18                      | 3.84                                      |
|                        | PSS3  | 19.01                              | 1063.5                                         | 23.59                      | 2.36                                      |
| <b>NaCl<br/>6 w/V%</b> | PSS1* | 12.96                              | 1092.7                                         | 12.07                      | 3.64                                      |
|                        | PSS2* | 13.41                              | 1092.7                                         | 12.82                      | 3.49                                      |
|                        | PSS3* | 16.45                              | 1099.1                                         | 17.37                      | 2.86                                      |

**Table S4.** DSM average velocity in acid and basic solutions.

| <b>Particle</b>                   |     | <b>Dry particle diameter (μm)</b> | <b>Hydrated particle diameter (μm)</b> | <b>Average velocity (mm/s)</b> |
|-----------------------------------|-----|-----------------------------------|----------------------------------------|--------------------------------|
| Acid Solution HCl<br>pH = 4       | PAS | 503.4                             | 910.8                                  | 14.61                          |
| Basic Solution<br>NaOH<br>pH = 10 | PBS | 538.3                             | 969.0                                  | 15.04                          |
